# Supplementary material
Source: PubMed Central journal article supplement (PMC9535533)
Supplement: jamasurg-e224702-s001.pdf [file jamasurg-e224702-s001.pdf]

1

2

## Protocol

3 Title: Phase 2 Study of Neoadjuvant Intensity-modulated Radiotherapy  
4 for Centrally located Hepatocellular Carcinoma

5

6

7

Principal investigators:

8

Prof. Jianxiong Wu, MD & Prof. Weihu Wang, MD

9

10

11 Jianxiong Wu, Department of Hepatobiliary Surgery, National Cancer Center/National Clinical  
12 Research Center for Cancer/Cancer Hospital, Chinese Academy of Medical Sciences and Peking Union  
13 Medical College, No. 17 Panjiayuan Nanli Area, Chaoyang District, Beijing 100021, China

14 Weihu Wang, Key Laboratory of Carcinogenesis and Translational Research, Department of Radiation  
15 Oncology, Peking University Cancer Hospital & Institute, No. 52 Fucheng Road, Haidian District,  
16 Beijing, 100142, China.

17

18

Version: 1.0

19

Date: September 5, 2014

20

21  
22  
23  
24  
25  
26  
27  
28  
29  
30  
31  
32  
33  
34  
35  
36  
37  
38  
39  
40  
41  
42  
43  
44  
45  
46  
47  
48  
49  
50

## Table of Contents

|                                                                   |    |
|-------------------------------------------------------------------|----|
| 1. Definition of centrally located hepatocellular carcinoma ..... | 4  |
| 2. Introduction .....                                             | 4  |
| 3. Endpoints .....                                                | 5  |
| 3.1 Primary endpoint.....                                         | 5  |
| 3.2 Secondary endpoints.....                                      | 5  |
| 4. Study design and sample size .....                             | 6  |
| 4.1 Study design .....                                            | 6  |
| 4.2 Sample size.....                                              | 6  |
| 5. Patients.....                                                  | 6  |
| 5.1 Inclusion criteria .....                                      | 6  |
| 5.2 Exclusion criteria .....                                      | 7  |
| 6. Treatments.....                                                | 7  |
| 6.1 Intensity-modulated Radiotherapy .....                        | 7  |
| 6.2 Surgery.....                                                  | 8  |
| 7. Study procedures.....                                          | 9  |
| 7.1 Screening phase .....                                         | 9  |
| 7.2 Treatment phase .....                                         | 9  |
| 7.3 Post-treatment phase.....                                     | 10 |
| 8. Efficacy.....                                                  | 10 |
| 8.1 Radiographic tumor response to radiation.....                 | 10 |
| 8.2 Pathological response .....                                   | 10 |
| 9. Safety evaluation.....                                         | 11 |
| 9.1 Adverse event .....                                           | 11 |
| 9.2 Serious adverse event .....                                   | 11 |
| 9.3 Safety analysis .....                                         | 12 |
| 10. Statistical analysis .....                                    | 12 |
| 10.1 Study population .....                                       | 12 |
| 10.2 Survival analysis .....                                      | 12 |
| 10.3 Efficacy analysis .....                                      | 12 |

|    |                                              |    |
|----|----------------------------------------------|----|
| 51 | 10.4 Safety analysis .....                   | 13 |
| 52 | 10.5 Analysis methods .....                  | 13 |
| 53 | 11. Regulatory ethics compliance .....       | 13 |
| 54 | 11.1 Investigator responsibilities .....     | 13 |
| 55 | 11.2 Informed consent.....                   | 13 |
| 56 | 11.3 Compensation to research patients ..... | 14 |
| 57 | 11.4 Institutional review board.....         | 14 |
| 58 | 12. Administrative requirements .....        | 14 |
| 59 | 13. References .....                         | 14 |
| 60 |                                              |    |
| 61 |                                              |    |

62 **1. Definition of centrally located hepatocellular carcinoma**

63 Centrally located hepatocellular carcinoma (HCC) is defined as a carcinoma adjoined hepatic portals,  
64 less than 1 cm from major vascular structures (including the main portal branches, the main trunks of  
65 the hepatic veins as well as the inferior vena cava) which are usually located in Couinaud segments I,  
66 IV, V, VIII, or at the junction of the central segments.[1] All centrally located HCCs should be  
67 confirmed through multidisciplinary team (MDT) discussion based on clinical or pathological  
68 diagnosis. Physicians participating in the MDT discussion should include senior doctors from  
69 department of radiology, radiation oncology, hepatobiliary surgery, and pathology.

70

71 **2. Introduction**

72 Hepatocellular carcinoma (HCC) is the fifth most common malignancy worldwide, and its incidence is  
73 on the rise.[2] For resectable HCC, the primary therapy is resection or liver transplant.[3] Considering  
74 a lack of healthy liver donor, liver resection has been considered the first choice for HCC at our  
75 center. However, for centrally located HCC, in which the lesions are attached or adjacent to major  
76 blood vessels, it's difficult to achieve complete resection. Mesohepatectomy and extended  
77 hemihepatectomy are currently the main surgical approaches,[4] yet the risk of incomplete resection or  
78 narrow surgical margins (<1 cm) is high, which may result in higher recurrence and decreased overall  
79 survival (OS).[5,6] Thus, it is necessary to built new treatment modalities to improve the prognosis of  
80 centrally located HCC.

81 Historically, radiotherapy has not played a significant role in the treatment of liver malignancies  
82 because of the low tolerance of the whole liver to radiation. With improvements in 3-dimensional  
83 conformal radiotherapy and intensity-modulated radiotherapy, higher doses of radiation can be  
84 delivered to target lesions with low doses to the noninvolved liver; thus, experience in the use of  
85 radiation for the treatment of focal HCC has increased.[7]

86 Considering that HCC is a relatively radiation-sensitive tumor,[8] we suppose that by applying  
87 neoadjuvant radiotherapy before surgery could potentially improve treatment outcomes. The main

88 hypotheses of preoperative radiotherapy for centrally located HCC are: (1) to reduce tumor burden so  
89 that the difficulty of hepatic resection would be decreased; (2) to increase the distance between the  
90 tumors and major vascular vessels, and (3) to improve long-term results of surgery. However, the value  
91 of neoadjuvant IMRT for centrally located HCC has not been reported in prospective studies. In this  
92 study, we would like to explore the efficacy and safety of neoadjuvant IMRT followed by radical  
93 surgery in patients with centrally located HCC.

94

### 95 **3. Endpoints**

#### 96 **3.1 Primary endpoint**

97 The primary endpoint is 5-year overall survival (OS). OS is calculated as the period from the date of  
98 the first radiation to death from any cause or the last follow-up, whichever came first.

#### 99 **3.2 Secondary endpoints**

100 The secondary endpoints are tumor response to intensity-modulated radiotherapy (IMRT), 5-year  
101 disease-free survival (DFS), and treatment-related adverse events.

102 ● Radiographic tumor response is evaluated according to the modified Response Evaluation  
103 Criteria in Solid Tumors guidelines. Major pathological response (MPR) is defined as the  
104 presence of 10% or fewer viable tumor cells in the primary tumor. The MPR includes  
105 complete pathological response (pCR), defined as no residual viable tumor cells in the  
106 resected liver cancer specimen.

107 ● DFS is defined as the time interval between the date of surgery and that of the first detection  
108 of recurrence, death from any cause, or the last follow-up, whichever came first.

109 ● Radiation-related toxicity will be evaluated weekly during RT and monthly after RT and  
110 graded according to the National Cancer Institute Common Terminology Criteria for Adverse  
111 Events (version 4.0.3). Acute toxicity is defined as events occurring during or within the first  
112 3 months after treatment. Late toxicity will be assessed at least 3 months after treatment.

113 Operative complications will be graded according to the Clavien–Dindo classification  
114 system.<sup>12</sup>

#### 115 **4. Study design and sample size**

##### 116 **4.1 Study design**

117 This single-center, single-arm, prospective phase 2 study was approved by the Ethical Committee of  
118 the Cancer Institute and Hospital of the Chinese Academy of Medical Science.

##### 119 **4.2 Sample size**

120 Based on our previous prospective randomized study, the estimated 5-year OS rate was 37.2% in  
121 patients with centrally located HCC who received narrow-margin hepatectomy alone. It was assumed  
122 that when treated with neoadjuvant IMRT followed by surgery, the 5-year OS rate of centrally located  
123 HCC would be close to that of Barcelona Clinic Liver Cancer Staging Classification (BCLC) 0–A  
124 disease, which was approximately 67% at our center. The enrolment period was 4 years. All patients  
125 were followed up for at least 2.5 years. The minimum sample size was 35 (two-sided  $\alpha = 0.05$ ;  $\beta = 0.10$ ;  
126 power 90%) estimated using the Power Analysis and Sample Size software (version 15.0.5, NCSS,  
127 Kaysville, Utah). The dropout rate was assumed to be 5%.

#### 128 **5. Patients**

##### 129 **5.1 Inclusion criteria**

- 130 ● Age between 18 and 75 years;
- 131 ● Eastern Cooperative Oncology Group performance status of 0–1;
- 132 ● A pathological diagnosis of HCC through percutaneous liver biopsy or clinical diagnosis of  
133 HCC based on typical radiographic characteristics;
- 134 ● At least one measurable lesion;
- 135 ● Child–Pugh A liver function;

- 136 ● Serum bilirubin  $\leq 1.5 \times$  the upper limit of normal (ULN), alanine transaminase (ALT) and  
137 aspartate aminotransferase (AST)  $\leq 2.5 \times$  ULN;
- 138 ● Normal creatinine and urea nitrogen;
- 139 ● Baseline white blood cell count  $> 4 \times 10^9/L$ , haemoglobin  $> 110$  g/L, and platelet count  $> 90 \times$   
140  $10^9/L$ ;
- 141 ● Patients should be aware of the purpose of the study and the operations required by the study  
142 and volunteer to participate in the study before signing the informed consent form.

## 143 **5.2 Exclusion criteria**

- 144 ● Any previous antitumor treatment of HCC;
- 145 ● Tumor edges that could not be defined;
- 146 ● Severe cirrhosis complications;
- 147 ● A history of other malignancies;
- 148 ● Inability to reach required IMRT doses;
- 149 ● pathological type other than HCC;
- 150 ● tumor thrombosis in the main trunk of the portal vein or inferior vena cava;
- 151 ● lymph node or remote metastasis.

## 152 **6. Treatments**

### 153 **6.1 Intensity-modulated Radiotherapy**

154 Liver-directed neoadjuvant IMRT will be delivered to all of the patients. Gross tumor volume (GTV),  
155 including primary tumor (GTVp) and tumor thrombosis (GTVt), will be delineated on planning CT  
156 scan, referring to pretreatment multiphase contrast MRI through an image fusion approach. Clinical  
157 target volume (CTV) includes the GTVp plus a 0.5 cm margin in all directions and GTVt without a

158 margin. The planning target volume (PTV) includes a 0.5 cm margin in the anterior-posterior and  
159 left-right directions and a 1.0 cm margin in the cranial-caudal direction around the CTV. The  
160 prescription dose to 95% of the PTV is planned at 50–60 Gy in 25–30 fractions over 5–6 weeks,  
161 depending on the dose constraints of organs at risk (OARs).

162 The dose constraints for the OARs are as follows: whole liver, mean dose  $\leq 24$  Gy; stomach and  
163 duodenum, maximum dose  $\leq 54$  Gy, V50  $\leq 10$  mL; colon, maximum dose  $\leq 55$  Gy, V52  $\leq 10$  mL; spinal  
164 cord planning risk volume, maximum dose  $\leq 40$  Gy; and left and right kidney, V20  $\leq 30\%$ . To ensure  
165 the repeatability of the position of the stomach and duodenum, all patients will be asked to fast 4 hours  
166 before simulation or radiotherapy. Cone-beam CT will be performed in the first five fractions and then  
167 once a week if the setup errors were  $< 0.5$  cm in the first five fractions.

## 168 **6.2 Surgery**

169 All patients will undergo hepatectomy using a selective and dynamic region-specific vascular occlusion  
170 technique. The first step of the procedure is ligating and dividing the ligaments around the liver to  
171 make it movable. Then, intraoperative ultrasonography will be used to define the tumor location and  
172 display the vessels to be manipulated during resection. The extent of HCC resection is based on tumor  
173 location, tumor size, relation of the tumor to the major vascular structures, and the degree of hepatic  
174 cirrhosis.

175 A precise hepatic hilar dissection will be performed before resecting the tumor. Depending on the  
176 transection area, the left or right portal vein and hepatic artery will be dissected in the hilum and  
177 encircled with vessel tapes. When liver parenchymal dissection is performed on the right side of the  
178 Cantlie line, the right hepatic artery and portal vein will be occluded intermittently and the left area is  
179 free from clamping. When the dissection is performed on the left side of the Cantlie line, similar  
180 occlusion will be applied on the left hepatic artery and portal vein and the right area will be free from  
181 clamping. A dynamic procedure will be used for hepatic blood flow, such that outflow occlusion is  
182 applied only when necessary and the IVC is occluded only in emergency situations. In cases where the  
183 tumor is adherent to the major vascular structures, surgeons would carefully dissect and peel the lesions  
184 away from the vascular surface using a Cavitron Ultrasonic Surgical Aspirator (CUSA) to avoid cutting



185 the major vessels and prevent postoperative liver failure. After tumor removal, the specimen will be  
186 examined to measure resection margin (the shortest distance from the edge of the tumor to the plane of  
187 liver transection).

## 188 **7. Study procedures**

### 189 **7.1 Screening phase**

190 Screening procedures will be completed within 14 days before treatment:

- 191 ● Review of eligibility criteria;
- 192 ● Signed informed consent;
- 193 ● Review of medical history and demographics;
- 194 ● Physical examinations;
- 195 ● Vital signs;
- 196 ● Pathological diagnosis of HCC through percutaneous liver biopsy;
- 197 ● ECOG performance status;
- 198 ● Laboratory tests including hematological, biochemical, endocrinologic, virological, and  
199 urine and feces examinations;
- 200 ● Electrocardiogram/echocardiography;
- 201 ● Abdominal-pelvic contrast-enhanced CT, abdominal magnetic resonance imaging (MRI)  
202 scan, thoracic and brain contrast-enhanced CT scan.

### 203 **7.2 Treatment phase**

204 Liver-directed neoadjuvant IMRT will be performed in all of the patients. The prescription dose to 95%  
205 of the PTV is planned at 50–60 Gy in 25–30 fractions over 5–6 weeks, mainly depending on the dose  
206 constraints of OARs. Adverse events should be monitored throughout the treatment period based on

207 patient report, investigator's observation, and each examination. Surgery will be performed 4–12 weeks  
208 post-IMRT. An MDT discussion is necessary before surgery for all patients. All operations would be  
209 carried out by the same surgical team to standardize operative quality and safety.

### 210 **7.3 Post-treatment phase**

211 All patients will be followed up every 3 months during the first 2 years after hepatectomy, then every 6  
212 months during the next 3 years, and every year thereafter. Follow-up tests include alpha-fetoprotein  
213 (AFP), liver function, chest CT, and abdominal MRI and/or CT. The patients will be diagnosed with  
214 recurrence based on typical imaging findings and/or continually increased serum AFP levels. Patients  
215 will be followed until death or the end of study.

## 216 **8. Efficacy**

### 217 **8.1 Radiographic tumor response to radiation**

218 Radiographic tumor response to radiation is evaluated according to the modified Response Evaluation  
219 Criteria in Solid Tumors guidelines. Response will be assessed by the investigator before surgery.

- 220 ● Complete response (CR) is defined as the disappearance of all viable (enhancement in the  
221 arterial phase) target lesions.
- 222 ● Partial response (PR) is defined as a decrease of at least 30% in the sum of the diameters of the  
223 viable target lesions.
- 224 ● Progressed disease (PD) is defined as the appearance of any new malignant lesions or an  
225 increase of 20% in the sum of the diameters of viable target lesions.
- 226 ● Standard disease (SD) is defined as a tumor response between PR and PD.

### 227 **8.2 Pathological response**

228 Pathological results are reported by at least two pathologists with expertise in gastrointestinal pathology,  
229 according to protocols for examining of specimens from patients with hepatocellular carcinoma by the  
230 College of American Pathology.

- 231 ● A negative margin is defined as the absence of tumor cells at the edge of the specimen.
- 232 ● Major pathological response is defined as the presence of 10% or fewer viable tumor cells in
- 233 the primary tumor. Major pathological response includes complete pathological response,
- 234 which is defined as no residual viable tumor cells in the resected liver cancer specimen, as per
- 235 current College of American Pathologists synoptic reporting.

## 236 **9. Safety evaluation**

### 237 **9.1 Adverse event**

238 All adverse symptom or sign, laboratory abnormality, or illnesses that occur from the time patients sign

239 the informed consent until 12 months after surgery will be collected. The investigators should record

240 any adverse event in detail, including adverse events and all associated symptoms description,

241 occurrence time, severity, relationship with the treatment, duration, corresponding treatment, and final

242 outcomes.

243 Adverse events include the following:

- 244 ● Exacerbation of the existing medical condition/disease (including symptoms, signs, and
- 245 laboratory tests) prior to entering the clinical trial;
- 246 ● Any newly occurring adverse medical conditions (including symptoms, signs, and newly
- 247 diagnosed diseases);
- 248 ● Abnormal laboratory test values or results of clinical significance;

### 249 **9.2 Serious adverse event**

250 A serious adverse event is defined as a harmful adverse event that meets the following criteria:

- 251 ● Results in death or life-threatening;
- 252 ● Requires hospitalization or prolongation of existing hospitalization;
- 253 ● Results in persistent or significant disability/incapacity;

254 ● Congenital anomaly/birth defect.

255 Important medical events that may require medical or surgical intervention, based upon medical  
256 judgment, to prevent one of the outcomes listed in the definition above may be considered a serious  
257 adverse experience. All serious adverse events occurring during the study must be reported to  
258 Institutional Review Board (IRB) within 24 hours. The initial and follow-up reports of a serious  
259 adverse event should be made.

### 260 **9.3 Safety analysis**

261 NCI-CTCAE 4.0.3 is used to evaluate the grade of adverse events, to observe any adverse events and  
262 serious adverse events that occurred in all patients during the clinical study period, including abnormal  
263 laboratory examination results, clinical manifestations and vital signs, to record their clinical  
264 manifestation characteristics, severity, occurrence time, duration, treatment method and outcomes, and  
265 to determine their relationship with the study drug.

## 266 **10. Statistical analysis**

### 267 **10.1 Study population**

268 All patients who finish per-protocol treatment will be included in the analysis.

### 269 **10.2 Survival analysis**

270 OS is calculated as the period from the date of the first radiation to death from any cause or the last  
271 follow-up, whichever came first.

272 DFS is defined as the time interval between the date of surgery and that of the first detection of  
273 recurrence, death from any cause, or the last follow-up, whichever came first.

### 274 **10.3 Efficacy analysis**

275 Radiographic tumor response is evaluated according to the modified Response Evaluation Criteria in  
276 Solid Tumors guidelines. Major pathological response (MPR) is defined as the presence of 10% or

277 fewer viable tumor cells in the primary tumor. The MPR includes complete pathological response  
278 (pCR), defined as no residual viable tumor cells in the resected liver cancer specimen. Objective  
279 response rate is defined as the proportion of patients with complete or partial response.

#### 280 **10.4 Safety analysis**

281 All adverse events, deaths, clinical laboratory results and vital sign measurements will be included in  
282 the safety analysis.

#### 283 **10.5 Analysis methods**

284 Continuous variables are expressed as median (range) or mean  $\pm$  standard deviation (SD), as  
285 appropriate. Categorical variables are expressed as n (proportion). The baseline ALBI score is  
286 calculated as follows: ALBI score = (log<sub>10</sub> bilirubin ( $\mu$ mol/L)  $\times$  0.66) + (albumin (g/L)  $\times$  -0.085).  
287 ALBI scores  $\leq$  -2.60 were graded as ALBI grade 1, -2.60  $\sim$  -1.39 as ALBI grade 2 and  $>$  -1.39 as ALBI  
288 grade 3.

289 The Kaplan–Meier estimator is performed to calculate the median survival time and survival rates  
290 (DFS and OS). All statistical analyses are performed using SPSS Statistics (v24.0, IBM; Armonk, NY)  
291 and R (v4.1.0, R Foundation, Vienna, Austria).

### 292 **11. Regulatory ethics compliance**

#### 293 **11.1 Investigator responsibilities**

294 The investigators are responsible for ensuring that the clinical study is performed in accordance with  
295 the protocol, current International Council for Harmonisation (ICH) guideline on Good Clinical  
296 Practice (GCP), and applicable regulatory and country-specific requirements.

#### 297 **11.2 Informed consent**

298 Each patient must give written consent according to local requirements after the nature of the study has  
299 been fully explained. The informed consent should be in accordance with principles that originated in  
300 the Declaration of Helsinki, current ICH and GCP guidelines, applicable regulatory requirements.

301 Before enrolment in the study, the investigator must explain to potential patients the aims, methods,  
302 reasonably anticipated benefits, and potential hazards of the study, any discomfort participation in the  
303 study may entail. Patients will be informed that their participation is voluntary and that they may  
304 withdraw consent to participate at any time. They will be informed that choosing not to participate will  
305 not affect the patient's care for the treatment. The patient will be given the opportunity to ask questions.  
306 After the explanation and before entry into the study, consent should be recorded by the patient's  
307 personally dated signature. After having obtained the consent, a copy of the informed consent form  
308 must be given to the patient.

### 309 **11.3 Compensation to research patients**

310 A patient is entitled to compensation if injury or death is due to adverse effect of investigational  
311 treatment. Compensation must be consistent with the region's laws, regulations, and guidelines in  
312 which the study is conducted.

### 313 **11.4 Institutional review board**

314 Before the start of the study, the investigator will provide the institutional review board (IRB) with  
315 current and complete copies of the documents, which include, but are not limited to, final protocol,  
316 informed consent, investigators' curriculum vitae, information regarding funding, and other potential  
317 conflicts of interest. The study will be undertaken only after the IRB has given full approval of all the  
318 documents. All the protocol amendments must be submitted to the IRB for review and approval before  
319 implementation of the changes.

## 320 **12. Administrative requirements**

321 The investigators should perform the following aspects, which include, but are not limited to, protocol  
322 amendments, regulatory documentation, case report form completion, record retention, monitoring, and  
323 data quality control.

## 324 **13. References**

325 1. Yu W, Wang W, Rong W, et al. Adjuvant radiotherapy in centrally located hepatocellular

- 326 carcinomas after hepatectomy with narrow margin (<1 cm): a prospective randomized study. *J Am*  
327 *Coll Surg* 2014;218:381-92.
- 328 2. Parkin DM, Bray F, Ferlay J, et al: Estimating the world cancer burden: Globocan 2000. *Int J*  
329 *Cancer* 2001;94:153-156.
- 330 3. Lin TY, Lee CS, Chen KM: Role of surgery in the treatment of primary carcinoma of the liver: a  
331 31-year experience. *Br J Surg* 1987;74:838-842.
- 332 4. Chen XP, Hu DY, Zhang ZW, et al. Role of mesohepatectomy with or without transcatheter  
333 arterial chemoembolization for large centrally located hepatocellular carcinoma. *Digest surg*  
334 2007;24:208-13.
- 335 5. Jeng KS, Jeng WJ, Sheen IS, Lin CC, Lin CK. Is less than 5 mm as the narrowest surgical margin  
336 width in central resections of hepatocellular carcinoma justified? *Am J Surg* 2013;206:64-71.
- 337 6. Nara S, Shimada K, Sakamoto Y, et al. Prognostic impact of marginal resection for patients with  
338 solitary hepatocellular carcinoma: evidence from 570 hepatectomies. *Surgery* 2012;151:526-36.
- 339 7. Feng M, Ben-Josef E. Radiation therapy for hepatocellular carcinoma. *Semin Radiat Oncol*.  
340 2011;21:271-7.
- 341 8. Tai A, Erickson B, Khater KA, Li XA. Estimate of Radiobiologic Parameters From Clinical Data  
342 for Biologically Based Treatment Planning for Liver Irradiation. *Int J Radiat Oncol Biol Phys*  
343 2008;70:900-07.
