# Supplementary material
Source: PubMed Central journal article supplement (PMC9535533)
Supplement: jamasurg-e224702-s002.pdf [file jamasurg-e224702-s002.pdf]

---

## Supplementary Online Content

Wu F, Chen B, Dong D, et al. Phase 2 evaluation of neoadjuvant intensity-modulated radiotherapy in centrally located hepatocellular carcinoma: a nonrandomized controlled trial. *JAMA Surg*. Published online October 5, 2022. doi:10.1001/jamasurg.2022.4702

**eTable 1.** Pattern of Recurrence

**eTable 2.** Acute Radiation-Related Adverse Events

This supplementary material has been provided by the authors to give readers additional information about their work.

---

**eTable 1. Pattern of Recurrence**

| Recurrence Pattern           | n (%)     |
|------------------------------|-----------|
| Total No. of cases           | 20 (52.6) |
| Early recurrence (< 2 years) | 14 (36.8) |
| Late recurrence (≥ 2 years)  | 6 (15.8)  |
| Intrahepatic recurrence†     | 15 (39.5) |
| Marginal                     | 2 (5.3)   |
| Non-marginal                 | 14 (36.8) |
| Extrahepatic metastasis      | 9 (23.7)  |
| Lung                         | 7 (18.4)  |
| Lymph node‡                  | 5 (13.2)  |
| Peritoneum                   | 1 (2.6)   |
| Pelvic nodule                | 1 (2.6)   |

Data are n (%). †1 case of both marginal and non-marginal recurrence; ‡3 cases of retroperitoneal lymph node metastasis, 1 case of hilar lymph node metastasis, and 1 case of mediastinal lymph node metastasis.

---

**eTable 2. Acute Radiation-Related Adverse Events**

| Event               | Any Grade | Grade 1   | Grade 2  | Grade 3 |
|---------------------|-----------|-----------|----------|---------|
| Fatigue             | 6 (15.8)  | 6 (15.8)  | 0        | 0       |
| Nausea              | 3 (7.9)   | 3 (7.9)   | 0        | 0       |
| Vomiting            | 1 (2.6)   | 1 (2.6)   | 0        | 0       |
| Diarrhea            | 1 (2.6)   | 1 (2.6)   | 0        | 0       |
| Radiodermatitis     | 9 (23.7)  | 9 (23.7)  | 0        | 0       |
| Leukopenia          | 19 (50.0) | 13 (34.2) | 6 (15.8) |         |
| Thrombocytopenia    | 13 (34.2) | 7 (18.4)  | 5 (13.2) | 1 (2.6) |
| Anemia              | 0         | 0         | 0        | 0       |
| ALT increased       | 9 (23.7)  | 6 (15.8)  | 2 (5.3)  | 1 (2.6) |
| AST increased       | 14 (36.8) | 12 (31.6) | 1 (2.6)  | 1 (2.6) |
| Bilirubin increased | 16 (42.1) | 16 (42.1) | 0        | 0       |
| Hypoalbuminemia     | 5 (13.2)  | 5 (13.2)  | 0        | 0       |

Data are n (%). ALT, alanine aminotransferase; AST, aspartate aminotransferase.
