# Supplementary material
Source: PubMed Central journal article supplement (PMC9535533)
Supplement: jamasurg-e224702-s003.pdf [file jamasurg-e224702-s003.pdf]

## Data Sharing Statement

Wu. Phase 2 Evaluation of Neoadjuvant Intensity-Modulated Radiotherapy in Centrally Located Hepatocellular Carcinoma. *JAMA Surg*. Published October 05, 2022.

doi:10.1001/jamasurg.2022.4702

### Data

**Data available:** Yes

**Data types:** Deidentified participant data

**How to access data:** Please contact the corresponding authors through e-mails. Jianxiong Wu, E-mail: [wjx0102@cicams.ac.cn](mailto:wjx0102@cicams.ac.cn) Weihu Wang, E-mail: [wangweihu88@163.com](mailto:wangweihu88@163.com)

**When available:** With publication

### Supporting Documents

**Document types:** None

### Additional Information

**Who can access the data:** Researchers whose proposed use of the data has been approved.

**Types of analyses:** For research only.

**Mechanisms of data availability:** With a signed data access agreement.
